# Supplementary material
Source: PubMed Central journal article supplement (PMC4443445)
Supplement: NIHMS685440-supplement-Supplemental.pdf [file NIHMS685440-supplement-Supplemental.pdf]

# THE LANCET Oncology

## Supplementary appendix

This appendix formed part of the original submission and has been peer reviewed. We post it as supplied by the authors.

Supplement to: Flaherty KT, Hennig M, Lee SJ, et al. Surrogate endpoints for overall survival in metastatic melanoma: a meta-analysis of randomised controlled trials. *Lancet Oncol* 2014; published online January 31. [http://dx.doi.org/10.1016/S1470-2045\(14\)70007-5](http://dx.doi.org/10.1016/S1470-2045(14)70007-5).

# The relationship between progression free and overall survival in metastatic melanoma: a meta-analysis of randomized, controlled trials

Keith T. Flaherty MD<sup>1\*</sup>, Michael Hennig PhD<sup>2</sup>, Sandra J. Lee PhD<sup>3</sup>, Paolo A. Ascierto MD<sup>4</sup>, Reinhard Dummer, MD, Full Prof<sup>5</sup>, Alexander M.M. Eggermont, PhD, Full Prof<sup>6</sup>, Axel Hauschild, MD<sup>7</sup>, Richard Kefford, PhD Full Prof<sup>8</sup>, John M. Kirkwood, MD Full Prof<sup>9</sup>, Georgina V. Long PhD<sup>10</sup>, Paul Lorigan MD<sup>11</sup>, Andreas Mackensen, MD, Full Prof<sup>12</sup>, Grant McArthur, PhD<sup>13</sup>, Steven O'Day, MD<sup>14</sup>, Poulam M. Patel, MD Full Prof<sup>15</sup>, Caroline Robert PhD<sup>16</sup>, Dirk Schadendorf, MD Full Prof<sup>17\*</sup>

## SUPPLEMENTARY DETAILS OF THE SEARCH STRATEGIES

Database                      Cochrane Database of Systematic Reviews (CDSR)  
 Search tool                    DIMDI with Classic Search (Command modus).  
  
 Date of Search                08.04.2013  
 Time:                            no restriction  
 Search filter                    None

| #  | Search terms                                                                               | Result |
|----|--------------------------------------------------------------------------------------------|--------|
| 1  | CDSR93                                                                                     | 7824   |
| 2  | CT D DACARBAZINE                                                                           | 2      |
| 3  | DACARBAZIN? OR DTIC OR NSC 45388 OR NSC45388 OR BIOCARBAZINE OR DECARBAZINE                | 4      |
| 4  | 2 OR 3                                                                                     | 4      |
| 5  | CT D MELANOMA                                                                              | 4      |
| 6  | MELANOM?                                                                                   | 18     |
| 7  | MELANOCARCINOMA# OR MELANOMATOSIS OR MELANOMALIGNOMA# OR NAEVOCARCINOMA# OR NEVOCARCINOMA# | 0      |
| 8  | MELANOBLASTOMA# OR MELANOCYTOBLASTOMA# OR PIGMENTARY CANCER#                               | 0      |
| 9  | 5 OR 6 OR 7 OR 8                                                                           | 18     |
| 10 | 4 AND 9                                                                                    | 1      |

Update                      15.06.2013

| #  | Search terms                                                                               | Result |
|----|--------------------------------------------------------------------------------------------|--------|
| 1  | CDSR93                                                                                     | 7928   |
| 2  | CT D DACARBAZINE                                                                           | 2      |
| 3  | DACARBAZIN? OR DTIC OR NSC 45388 OR NSC45388 OR BIOCARBAZINE OR DECARBAZINE                | 4      |
| 4  | 2 OR 3                                                                                     | 4      |
| 5  | CT D MELANOMA                                                                              | 4      |
| 6  | MELANOM?                                                                                   | 20     |
| 7  | MELANOCARCINOMA# OR MELANOMATOSIS OR MELANOMALIGNOMA# OR NAEVOCARCINOMA# OR NEVOCARCINOMA# | 0      |
| 8  | MELANOBLASTOMA# OR MELANOCYTOBLASTOMA# OR PIGMENTARY CANCER#                               | 0      |
| 9  | 5 OR 6 OR 7 OR 8                                                                           | 20     |
| 10 | 4 AND 9                                                                                    | 1      |

Database                      Data base of Abstracts of Reviews of Effects                      (CDAR)  
 Search tool                      DIMDI mit Classic Search (Command modus).  
 Date of Search                      08.04.2013  
 Time:                              no restriction  
 Search filter:                      None

| #  | Search terms                                                                                        | Result |
|----|-----------------------------------------------------------------------------------------------------|--------|
| 11 | CDAR94                                                                                              | 19619  |
| 12 | CT D DACARBAZINE                                                                                    | 8      |
| 13 | DACARBAZIN? OR DTIC OR NSC 45388 OR NSC45388 OR                      BIOCARBAZINE OR<br>DECARBAZINE | 20     |
| 14 | 12 OR 13                                                                                            | 20     |
| 15 | CT D MELANOMA                                                                                       | 50     |
| 16 | MELANOM?                                                                                            | 93     |
| 17 | MELANOCARCINOMA# OR MELANOMATOSIS OR MELANOMALIGNOMA# OR<br>NAEVOCARCINOMA# OR NEVOCARCINOMA#       | 0      |
| 18 | MELANOBLASTOMA# OR MELANOCYTOBLASTOMA# OR PIGMENTARY CANCER#                                        | 0      |
| 19 | 15 OR 16 OR 17 OR 18                                                                                | 93     |
| 20 | 14 AND 19                                                                                           | 8      |

Update                      15.06.2013

| #  | Search terms                                                                                        | Result |
|----|-----------------------------------------------------------------------------------------------------|--------|
| 11 | CDAR94                                                                                              | 22619  |
| 12 | CT D DACARBAZINE                                                                                    | 9      |
| 13 | DACARBAZIN? OR DTIC OR NSC 45388 OR NSC45388 OR                      BIOCARBAZINE OR<br>DECARBAZINE | 21     |
| 14 | 12 OR 13                                                                                            | 21     |
| 15 | CT D MELANOMA                                                                                       | 55     |
| 16 | MELANOM?                                                                                            | 99     |
| 17 | MELANOCARCINOMA# OR MELANOMATOSIS OR MELANOMALIGNOMA# OR<br>NAEVOCARCINOMA# OR NEVOCARCINOMA#       | 0      |
| 18 | MELANOBLASTOMA# OR MELANOCYTOBLASTOMA# OR PIGMENTARY CANCER#                                        | 0      |
| 19 | 15 OR 16 OR 17 OR 18                                                                                | 99     |
| 20 | 14 AND 19                                                                                           | 8      |

Database NHS Economic Evaluation Database (NHSEED)  
 Search tool DIMDI with Classic Search (Command modus).  
 Date of Search 08.04.2013  
 Time: no restriction  
 Search filter: None

| #  | Search terms                                                                                  | Result |
|----|-----------------------------------------------------------------------------------------------|--------|
| 21 | NHSEED                                                                                        | 12916  |
| 22 | CT D DACARBAZINE                                                                              | 8      |
| 23 | DACARBAZIN? OR DTIC OR NSC 45388 OR NSC45388 OR BIOCARBAZINE OR<br>DECARBAZINE                | 4      |
| 24 | 22 OR 23                                                                                      | 9      |
| 25 | CT D MELANOMA                                                                                 | 28     |
| 26 | MELANOM?                                                                                      | 38     |
| 27 | MELANOCARCINOMA# OR MELANOMATOSIS OR MELANOMALIGNOMA# OR<br>NAEVOCARCINOMA# OR NEVOCARCINOMA# | 0      |
| 28 | MELANOBLASTOMA# OR MELANOCYTOBLASTOMA# OR PIGMENTARY CANCER#                                  | 0      |
| 29 | 25 OR 26 OR 27 OR 28                                                                          | 39     |
| 30 | 24 AND 29                                                                                     | 2      |

Update 15.06.2013

| #  | Search terms                                                                                  | Result |
|----|-----------------------------------------------------------------------------------------------|--------|
| 21 | NHSEED                                                                                        | 13913  |
| 22 | CT D DACARBAZINE                                                                              | 9      |
| 23 | DACARBAZIN? OR DTIC OR NSC 45388 OR NSC45388 OR BIOCARBAZINE OR<br>DECARBAZINE                | 4      |
| 24 | 22 OR 23                                                                                      | 10     |
| 25 | CT D MELANOMA                                                                                 | 28     |
| 26 | MELANOM?                                                                                      | 38     |
| 27 | MELANOCARCINOMA# OR MELANOMATOSIS OR MELANOMALIGNOMA# OR<br>NAEVOCARCINOMA# OR NEVOCARCINOMA# | 0      |
| 28 | MELANOBLASTOMA# OR MELANOCYTOBLASTOMA# OR PIGMENTARY CANCER#                                  | 0      |
| 29 | 25 OR 26 OR 27 OR 28                                                                          | 39     |
| 30 | 24 AND 29                                                                                     | 2      |

Database INAHTA Health Technology Assessment Database  
 Search tool DIMDI with Classic Search (command modus).  
 Date of Search 08.04.2013  
 Time: no restriction  
 Search filter: None

| #  | Search terms                                                                                  | Result |
|----|-----------------------------------------------------------------------------------------------|--------|
| 31 | INAHTA                                                                                        | 12049  |
| 32 | CT D DACARBAZINE                                                                              | 2      |
| 33 | DACARBAZIN? OR DTIC OR NSC 45388 OR NSC45388 OR BIOCARBAZINE OR<br>DECARBAZINE                | 3      |
| 34 | 32 OR 33                                                                                      | 3      |
| 35 | CT D MELANOMA                                                                                 | 54     |
| 36 | MELANOM?                                                                                      | 68     |
| 37 | MELANOCARCINOMA# OR MELANOMATOSIS OR MELANOMALIGNOMA# OR<br>NAEVOCARCINOMA# OR NEVOCARCINOMA# | 0      |
| 38 | MELANOBLASTOMA# OR MELANOCYTOBLASTOMA# OR PIGMENTARY CANCER#                                  | 0      |
| 39 | 35 OR 36 OR 37 OR 38                                                                          | 68     |
| 40 | 34 AND 39                                                                                     | 1      |

Update 15.06.2013

| #  | Search terms                                                                                  | Result |
|----|-----------------------------------------------------------------------------------------------|--------|
| 31 | INAHTA                                                                                        | 12290  |
| 32 | CT D DACARBAZINE                                                                              | 2      |
| 33 | DACARBAZIN? OR DTIC OR NSC 45388 OR NSC45388 OR BIOCARBAZINE OR<br>DECARBAZINE                | 3      |
| 34 | 32 OR 33                                                                                      | 3      |
| 35 | CT D MELANOMA                                                                                 | 55     |
| 36 | MELANOM?                                                                                      | 70     |
| 37 | MELANOCARCINOMA# OR MELANOMATOSIS OR MELANOMALIGNOMA# OR<br>NAEVOCARCINOMA# OR NEVOCARCINOMA# | 0      |
| 38 | MELANOBLASTOMA# OR MELANOCYTOBLASTOMA# OR PIGMENTARY CANCER#                                  | 0      |
| 39 | 35 OR 36 OR 37 OR 38                                                                          | 70     |
| 40 | 34 AND 39                                                                                     | 1      |

Database                      Cochrane Central Register of Controlled Trials (CCTR)  
 Search tool                    DIMDI with Classic Search (Command modus).  
 Date of Search                08.04.2013  
 Time:                            no restriction  
 Search filter:                 None

| #  | Search terms                                                                                  | Result |
|----|-----------------------------------------------------------------------------------------------|--------|
| 1  | CCTR93                                                                                        | 685241 |
| 2  | CT D DACARBAZINE                                                                              | 439    |
| 3  | DACARBAZIN? OR DTIC OR NSC 45388 OR NSC45388 OR            BIOCARBAZINE OR<br>DECARBAZINE     | 615    |
| 4  | 2 OR 3                                                                                        | 615    |
| 5  | CT D MELANOMA                                                                                 | 926    |
| 6  | MELANOM?                                                                                      | 1585   |
| 7  | MELANOCARCINOMA# OR MELANOMATOSIS OR MELANOMALIGNOMA# OR<br>NAEVOCARCINOMA# OR NEVOCARCINOMA# | 1      |
| 8  | MELANOBLASTOMA# OR MELANOCYTOBLASTOMA# OR PIGMENTARY CANCER#                                  | 0      |
| 9  | 5 OR 6 OR 7 OR 8                                                                              | 1586   |
| 10 | 4 AND 9                                                                                       | 286    |

Update                      15.06.2013

| #  | Search terms                                                                                  | Result |
|----|-----------------------------------------------------------------------------------------------|--------|
| 1  | CCTR93                                                                                        | 698186 |
| 2  | CT D DACARBAZINE                                                                              | 446    |
| 3  | DACARBAZIN? OR DTIC OR NSC 45388 OR NSC45388 OR            BIOCARBAZINE OR<br>DECARBAZINE     | 622    |
| 4  | 2 OR 3                                                                                        | 622    |
| 5  | CT D MELANOMA                                                                                 | 935    |
| 6  | MELANOM?                                                                                      | 1595   |
| 7  | MELANOCARCINOMA# OR MELANOMATOSIS OR MELANOMALIGNOMA# OR<br>NAEVOCARCINOMA# OR NEVOCARCINOMA# | 1      |
| 8  | MELANOBLASTOMA# OR MELANOCYTOBLASTOMA# OR PIGMENTARY CANCER#                                  | 0      |
| 9  | 5 OR 6 OR 7 OR 8                                                                              | 1596   |
| 10 | 4 AND 9                                                                                       | 288    |

Database MEDLINE  
 Search tool DIMDI with Classic Search (Command modus).  
 Date of Search 08.04.2013  
 Time from 1960  
 Search filter For Randomized Controlled Trials according to Wong SS, Wilczynski NL, Haynes RB.  
 Comparison of top-performing search strategies for detecting clinically sound treatment studies and systematic reviews in MEDLINE and EMBASE. J Med Libr Assoc 2006;94(4):451-5. Table 1: Strategy minimizing difference between sensitivity and specificity.

| #  | Search terms                                                                                        | Result   |
|----|-----------------------------------------------------------------------------------------------------|----------|
| 1  | ME60                                                                                                | 22645138 |
| 2  | CT D DACARBAZINE                                                                                    | 4714     |
| 3  | <b>4</b> DACARBAZIN? OR DTIC OR NSC 45388 OR NSC45388 OR BIOCARBAZINE OR DECARBAZINE                | 5711     |
| 4  | 2 OR 3                                                                                              | 5711     |
| 5  | CT D MELANOMA                                                                                       | 69128    |
| 6  | MELANOM?                                                                                            | 90337    |
| 7  | <b>5</b> MELANOCARCINOMA# OR MELANOMATOSIS OR MELANOMALIGNOMA# OR NAEVOCARCINOMA# OR NEVOCARCINOMA# | 241      |
| 8  | <b>6</b> MELANOBLASTOMA# OR MELANOCYTOBLASTOMA# OR PIGMENTARY CANCER#                               | 482      |
| 9  | 5 OR 6 OR 7 OR 8                                                                                    | 90489    |
| 10 | DT=RANDOMIZED CONTROLLED TRIAL                                                                      | 341299   |
| 11 | RANDOMIZED OR RANDOMISED                                                                            | 530620   |
| 12 | CT=RANDOMIZED?                                                                                      | 153990   |
| 13 | PLACEBO                                                                                             | 148432   |
| 14 | CT=PLACEBO                                                                                          | 33697    |
| 15 | 10 OR 11 OR 12 OR 13 OR 14                                                                          | 654978   |
| 16 | <b>7</b> CT D ANIMALS NOT CT D HUMANS                                                               | 3768189  |
| 17 | 15 NOT 16                                                                                           | 626488   |
| 18 | 4 AND 9 AND 17                                                                                      | 263      |

Update 15.06.2013

| #  | Search terms                                                                                        | Result   |
|----|-----------------------------------------------------------------------------------------------------|----------|
| 1  | ME60                                                                                                | 22829026 |
| 2  | CT D DACARBAZINE                                                                                    | 4792     |
| 3  | <b>8</b> DACARBAZIN? OR DTIC OR NSC 45388 OR NSC45388 OR BIOCARBAZINE OR DECARBAZINE                | 5793     |
| 4  | 2 OR 3                                                                                              | 5793     |
| 5  | CT D MELANOMA                                                                                       | 69649    |
| 6  | MELANOM?                                                                                            | 91252    |
| 7  | <b>9</b> MELANOCARCINOMA# OR MELANOMATOSIS OR MELANOMALIGNOMA# OR NAEVOCARCINOMA# OR NEVOCARCINOMA# | 241      |
| 8  | <b>10</b> MELANOBLASTOMA# OR MELANOCYTOBLASTOMA# OR PIGMENTARY CANCER#                              | 482      |
| 9  | 5 OR 6 OR 7 OR 8                                                                                    | 91405    |
| 10 | DT=RANDOMIZED CONTROLLED TRIAL                                                                      | 345049   |
| 11 | RANDOMIZED OR RANDOMISED                                                                            | 538074   |
| 12 | CT=RANDOMIZED?                                                                                      | 155495   |
| 13 | PLACEBO                                                                                             | 150002   |
| 14 | CT=PLACEBO                                                                                          | 33846    |
| 15 | 10 OR 11 OR 12 OR 13 OR 14                                                                          | 663295   |
| 16 | <b>11</b> CT D ANIMALS NOT CT D HUMANS                                                              | 3788694  |
| 17 | 15 NOT 16                                                                                           | 634392   |
| 18 | 4 AND 9 AND 17                                                                                      | 264      |
| 19 | 18 AND RD=08.04.2013 TO 15.06.2013                                                                  | 22       |

Database EMBASE/EMBASE ALERT  
 Search tool DIMDI with Classic Search (command modus).  
 Date of Search 08.04.2013  
 Time from 1974  
 Search filter For Randomized Controlled Trials according to Wong SS, Wilczynski NL, Haynes RB.  
 Comparison of top-performing search strategies for detecting clinically sound treatment studies and systematic reviews in MEDLINE and EMBASE. J Med Libr Assoc 2006;94(4):451-5. Table 1: Strategy minimizing difference between sensitivity and specificity.

| #  | Search terms                                                                                         | Result   |
|----|------------------------------------------------------------------------------------------------------|----------|
| 1  | EM74; EA08                                                                                           | 21851093 |
| 2  | CT D DACARBAZINE                                                                                     | 14303    |
| 3  | <b>12</b> DACARBAZIN? OR DTIC OR NSC 45388 OR NSC45388 OR BIOCARBAZINE OR DECARBAZINE                | 14727    |
| 4  | 2 OR 3                                                                                               | 14728    |
| 5  | CT D MELANOMA                                                                                        | 87134    |
| 6  | MELANOM?                                                                                             | 105697   |
| 7  | <b>13</b> MELANOCARCINOMA# OR MELANOMATOSIS OR MELANOMALIGNOMA# OR NAEVOCARCINOMA# OR NEVOCARCINOMA# | 162      |
| 8  | <b>14</b> MELANOBLASTOMA# OR MELANOCYTOBLASTOMA# OR PIGMENTARY CANCER#                               | 260      |
| 9  | 5 OR 6 OR 7 OR 8                                                                                     | 106058   |
| 10 | <b>15</b> RANDOM?/TI OR RANDOM?/AB                                                                   | 691735   |
| 11 | <b>16</b> DOUBLE-BLIND?/TI OR DOUBLE-BLIND?/AB                                                       | 122714   |
| 12 | PLACEBO?                                                                                             | 277433   |
| 13 | 10 OR 11 OR 12                                                                                       | 879371   |
| 14 | 4 AND 9 AND 13                                                                                       | 575      |

Update 15.06.2013

| #  | Search terms                                                                                         | Result   |
|----|------------------------------------------------------------------------------------------------------|----------|
| 1  | EM74; EA08                                                                                           | 22858790 |
| 2  | CT D DACARBAZINE                                                                                     | 14738    |
| 3  | <b>17</b> DACARBAZIN? OR DTIC OR NSC 45388 OR NSC45388 OR BIOCARBAZINE OR DECARBAZINE                | 15169    |
| 4  | 2 OR 3                                                                                               | 15170    |
| 5  | CT D MELANOMA                                                                                        | 94383    |
| 6  | MELANOM?                                                                                             | 113665   |
| 7  | <b>18</b> MELANOCARCINOMA# OR MELANOMATOSIS OR MELANOMALIGNOMA# OR NAEVOCARCINOMA# OR NEVOCARCINOMA# | 165      |
| 8  | <b>19</b> MELANOBLASTOMA# OR MELANOCYTOBLASTOMA# OR PIGMENTARY CANCER#                               | 263      |
| 9  | 5 OR 6 OR 7 OR 8                                                                                     | 114037   |
| 10 | <b>20</b> RANDOM?/TI OR RANDOM?/AB                                                                   | 775130   |
| 11 | <b>21</b> DOUBLE-BLIND?/TI OR DOUBLE-BLIND?/AB                                                       | 134263   |
| 12 | PLACEBO?                                                                                             | 297739   |
| 13 | 10 OR 11 OR 12                                                                                       | 970053   |
| 14 | 4 AND 9 AND 13                                                                                       | 631      |
| 15 | 14 AND RD=08.04.2013 TO 15.06.2013                                                                   | 27       |



Database Review , Update 15.06. – 08.09.2013

Date of Review: 08.09.2013

Update 08.09.2013

| #  | Search terms                                                                               | Result |
|----|--------------------------------------------------------------------------------------------|--------|
| 1  | CDSR93                                                                                     | 8037   |
| 2  | CT D DACARBAZINE                                                                           | 2      |
| 3  | DACARBAZIN? OR DTIC OR NSC 45388 OR NSC45388 OR BIOCARBAZINE OR DECARBAZINE                | 4      |
| 4  | 2 OR 3                                                                                     | 4      |
| 5  | CT D MELANOMA                                                                              | 4      |
| 6  | MELANOM?                                                                                   | 20     |
| 7  | MELANOCARCINOMA# OR MELANOMATOSIS OR MELANOMALIGNOMA# OR NAEVOCARCINOMA# OR NEVOCARCINOMA# | 0      |
| 8  | MELANOBLASTOMA# OR MELANOCYTOBLASTOMA# OR PIGMENTARY CANCER#                               | 0      |
| 9  | 5 OR 6 OR 7 OR 8                                                                           | 20     |
| 10 | 4 AND 9                                                                                    | 1      |

Update 08.09.2013

| #  | Search terms                                                                               | Result |
|----|--------------------------------------------------------------------------------------------|--------|
| 11 | CDAR94                                                                                     | 24546  |
| 12 | CT D DACARBAZINE                                                                           | 9      |
| 13 | DACARBAZIN? OR DTIC OR NSC 45388 OR NSC45388 OR BIOCARBAZINE OR DECARBAZINE                | 21     |
| 14 | 12 OR 13                                                                                   | 21     |
| 15 | CT D MELANOMA                                                                              | 60     |
| 16 | MELANOM?                                                                                   | 104    |
| 17 | MELANOCARCINOMA# OR MELANOMATOSIS OR MELANOMALIGNOMA# OR NAEVOCARCINOMA# OR NEVOCARCINOMA# | 0      |
| 18 | MELANOBLASTOMA# OR MELANOCYTOBLASTOMA# OR PIGMENTARY CANCER#                               | 0      |
| 19 | 15 OR 16 OR 17 OR 18                                                                       | 104    |
| 20 | 14 AND 19                                                                                  | 8      |

Update 08.09.2013

| #  | Search terms                                                                               | Result |
|----|--------------------------------------------------------------------------------------------|--------|
| 21 | NHSEED                                                                                     | 14420  |
| 22 | CT D DACARBAZINE                                                                           | 9      |
| 23 | DACARBAZIN? OR DTIC OR NSC 45388 OR NSC45388 OR BIOCARBAZINE OR DECARBAZINE                | 4      |
| 24 | 22 OR 23                                                                                   | 10     |
| 25 | CT D MELANOMA                                                                              | 29     |
| 26 | MELANOM?                                                                                   | 40     |
| 27 | MELANOCARCINOMA# OR MELANOMATOSIS OR MELANOMALIGNOMA# OR NAEVOCARCINOMA# OR NEVOCARCINOMA# | 0      |
| 28 | MELANOBLASTOMA# OR MELANOCYTOBLASTOMA# OR PIGMENTARY CANCER#                               | 0      |
| 29 | 25 OR 26 OR 27 OR 28                                                                       | 41     |
| 30 | 24 AND 29                                                                                  | 2      |

Update 08.09.2013

| #  | Search terms                                                                                  | Result |
|----|-----------------------------------------------------------------------------------------------|--------|
| 31 | INAHTA                                                                                        | 12511  |
| 32 | CT D DACARBAZINE                                                                              | 2      |
| 33 | DACARBAZIN? OR DTIC OR NSC 45388 OR NSC45388 OR BIOCARBAZINE OR<br>DECARBAZINE                | 3      |
| 34 | 32 OR 33                                                                                      | 3      |
| 35 | CT D MELANOMA                                                                                 | 58     |
| 36 | MELANOM?                                                                                      | 75     |
| 37 | MELANOCARCINOMA# OR MELANOMATOSIS OR MELANOMALIGNOMA# OR<br>NAEVOCARCINOMA# OR NEVOCARCINOMA# | 0      |
| 38 | MELANOBLASTOMA# OR MELANOCYTOBLASTOMA# OR PIGMENTARY CANCER#                                  | 0      |
| 39 | 35 OR 36 OR 37 OR 38                                                                          | 75     |
| 40 | 34 AND 39                                                                                     | 1      |

Update 08.09.2013

| #  | Search terms                                                                                  | Result |
|----|-----------------------------------------------------------------------------------------------|--------|
| 1  | CCTR93                                                                                        | 711013 |
| 2  | CT D DACARBAZINE                                                                              | 451    |
| 3  | DACARBAZIN? OR DTIC OR NSC 45388 OR NSC45388 OR BIOCARBAZINE OR<br>DECARBAZINE                | 628    |
| 4  | 2 OR 3                                                                                        | 628    |
| 5  | CT D MELANOMA                                                                                 | 945    |
| 6  | MELANOM?                                                                                      | 1612   |
| 7  | MELANOCARCINOMA# OR MELANOMATOSIS OR MELANOMALIGNOMA# OR<br>NAEVOCARCINOMA# OR NEVOCARCINOMA# | 1      |
| 8  | MELANOBLASTOMA# OR MELANOCYTOBLASTOMA# OR PIGMENTARY CANCER#                                  | 0      |
| 9  | 5 OR 6 OR 7 OR 8                                                                              | 1613   |
| 10 | 4 AND 9                                                                                       | 290    |

Update 08.09.2013

| #  | Search terms                                                                                  | Result   |
|----|-----------------------------------------------------------------------------------------------|----------|
| 1  | ME60                                                                                          | 23057728 |
| 2  | CT D DACARBAZINE                                                                              | 4877     |
| 3  | DACARBAZIN? OR DTIC OR NSC 45388 OR NSC45388 OR BIOCARBAZINE OR<br>DECARBAZINE                | 5906     |
| 4  | 2 OR 3                                                                                        | 5906     |
| 5  | CT D MELANOMA                                                                                 | 70389    |
| 6  | MELANOM?                                                                                      | 92433    |
| 7  | MELANOCARCINOMA# OR MELANOMATOSIS OR MELANOMALIGNOMA# OR<br>NAEVOCARCINOMA# OR NEVOCARCINOMA# | 241      |
| 8  | MELANOBLASTOMA# OR MELANOCYTOBLASTOMA# OR PIGMENTARY CANCER#                                  | 482      |
| 9  | 5 OR 6 OR 7 OR 8                                                                              | 92587    |
| 10 | DT=RANDOMIZED CONTROLLED TRIAL                                                                | 350106   |
| 11 | RANDOMIZED OR RANDOMISED                                                                      | 547702   |
| 12 | CT=RANDOMIZED?                                                                                | 157313   |
| 13 | PLACEBO                                                                                       | 151923   |
| 14 | CT=PLACEBO                                                                                    | 34070    |
| 15 | 10 OR 11 OR 12 OR 13 OR 14                                                                    | 673930   |
| 16 | CT D ANIMALS NOT CT D HUMANS                                                                  | 3813918  |
| 17 | 15 NOT 16                                                                                     | 644450   |
| 18 | 4 AND 9 AND 17                                                                                | 273      |
| 19 | 18 AND RD=15.06.2013 TO 08.09.2013                                                            | 21       |

Update 08.09.2013

| #  | Search terms                                                                               | Result   |
|----|--------------------------------------------------------------------------------------------|----------|
| 1  | EM74; EA08                                                                                 | 23606687 |
| 2  | CT D DACARBAZINE                                                                           | 15083    |
| 3  | DACARBAZIN? OR DTIC OR NSC 45388 OR NSC45388 OR BIOCARBAZINE OR DECARBAZINE                | 15528    |
| 4  | 2 OR 3                                                                                     | 15529    |
| 5  | CT D MELANOMA                                                                              | 99784    |
| 6  | MELANOM?                                                                                   | 119053   |
| 7  | MELANOCARCINOMA# OR MELANOMATOSIS OR MELANOMALIGNOMA# OR NAEVOCARCINOMA# OR NEVOCARCINOMA# | 165      |
| 8  | MELANOBLASTOMA# OR MELANOCYTOBLASTOMA# OR PIGMENTARY CANCER#                               | 263      |
| 9  | 5 OR 6 OR 7 OR 8                                                                           | 119436   |
| 10 | RANDOM?/TI OR RANDOM?/AB                                                                   | 825645   |
| 11 | DOUBLE-BLIND?/TI OR DOUBLE-BLIND?/AB                                                       | 140595   |
| 12 | PLACEBO?                                                                                   | 309967   |
| 13 | 10 OR 11 OR 12                                                                             | 1025463  |
| 14 | 4 AND 9 AND 13                                                                             | 665      |
| 15 | 14 AND RD=15.06.2013 TO 08.09.2013                                                         | 26       |
